# Supplementary material for: Impact of Electronic Cigarettes on the Upper Aerodigestive Tract: A Comprehensive Review for Otolaryngology Providers
Source: PubMed Central journal article supplement (PMC10046796; doi:10.1002/oto2.25), 2023-02-17

Goal 1: To provide a broad up-to-date overview of e-cigs

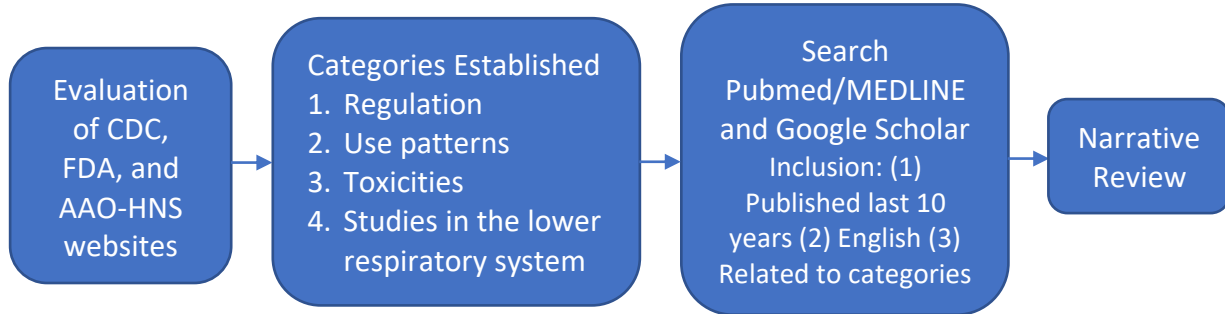

Goal 2: To provide a comprehensive review of the direct impact of e-cigs as is relevant to otolaryngology

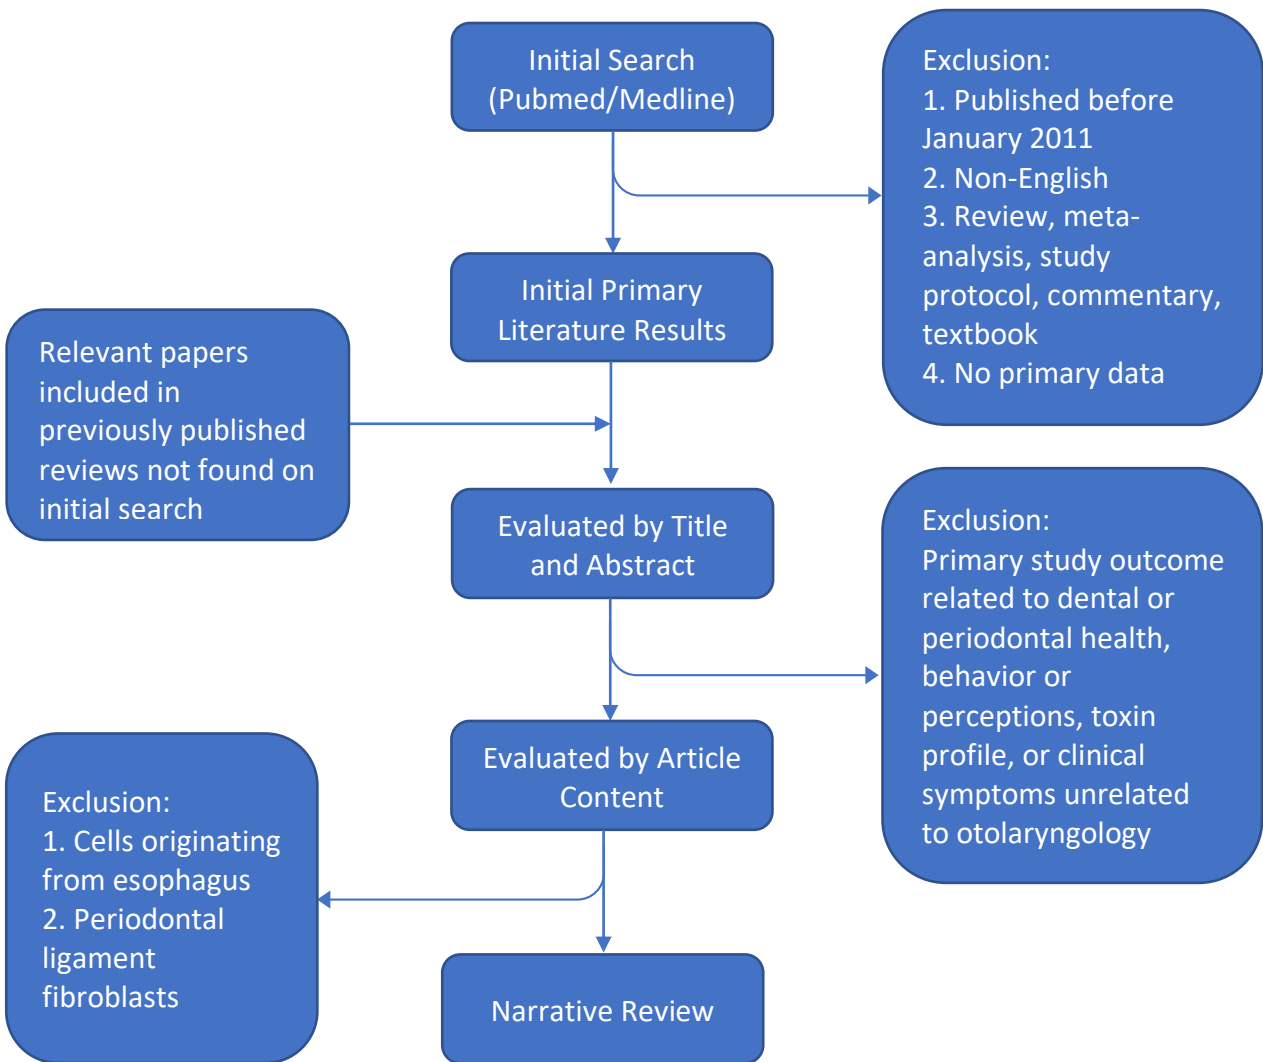

Supplement: OTO2-7-e25-s002.pdf [file OTO2-7-e25-s002.pdf]
